# Supplementary material for: Brittle Culm 12, a dual-targeting kinesin-4 protein, controls cell-cycle progression and wall properties in rice
Source: PubMed Central journal article supplement (PMC3440585; doi:10.1111/j.1365-313x.2010.04238.x), 2010-05-26

Figure S1

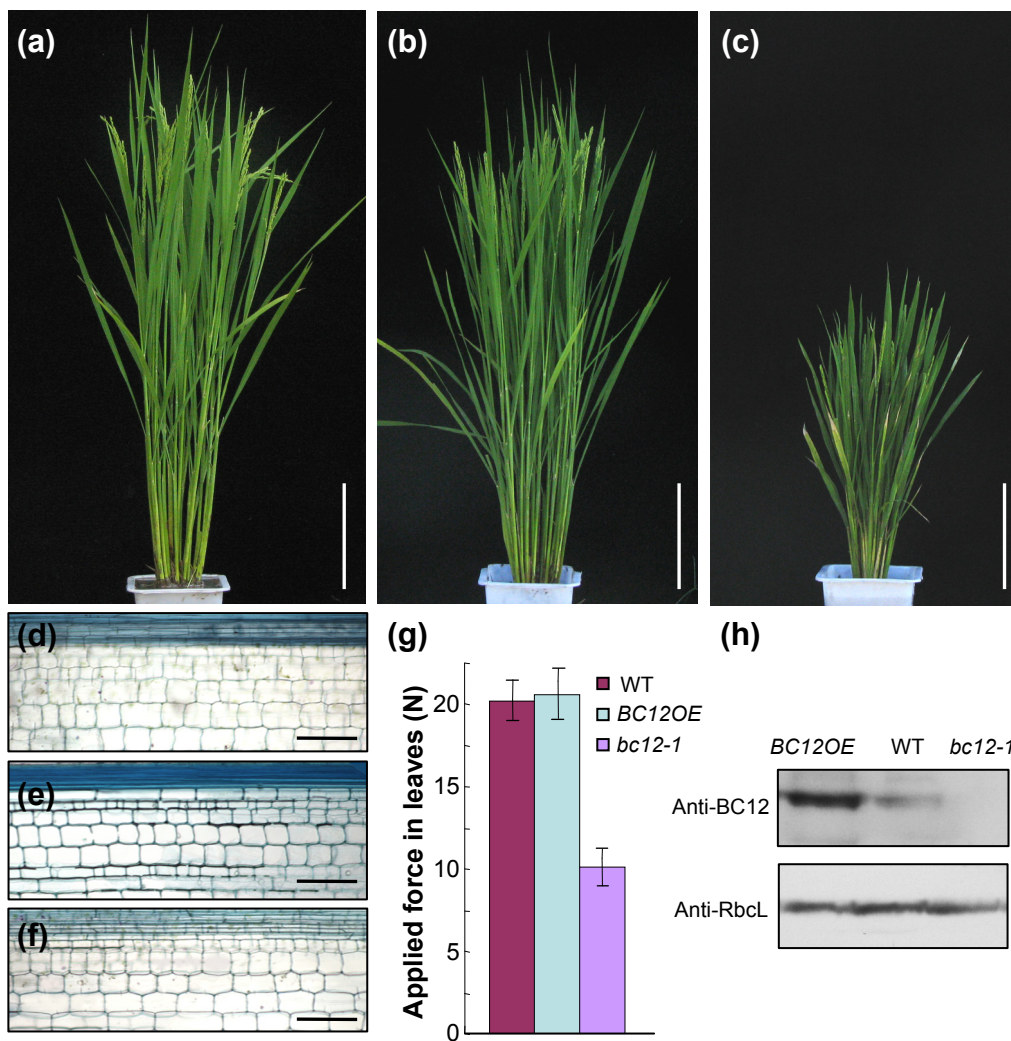

Figure S2

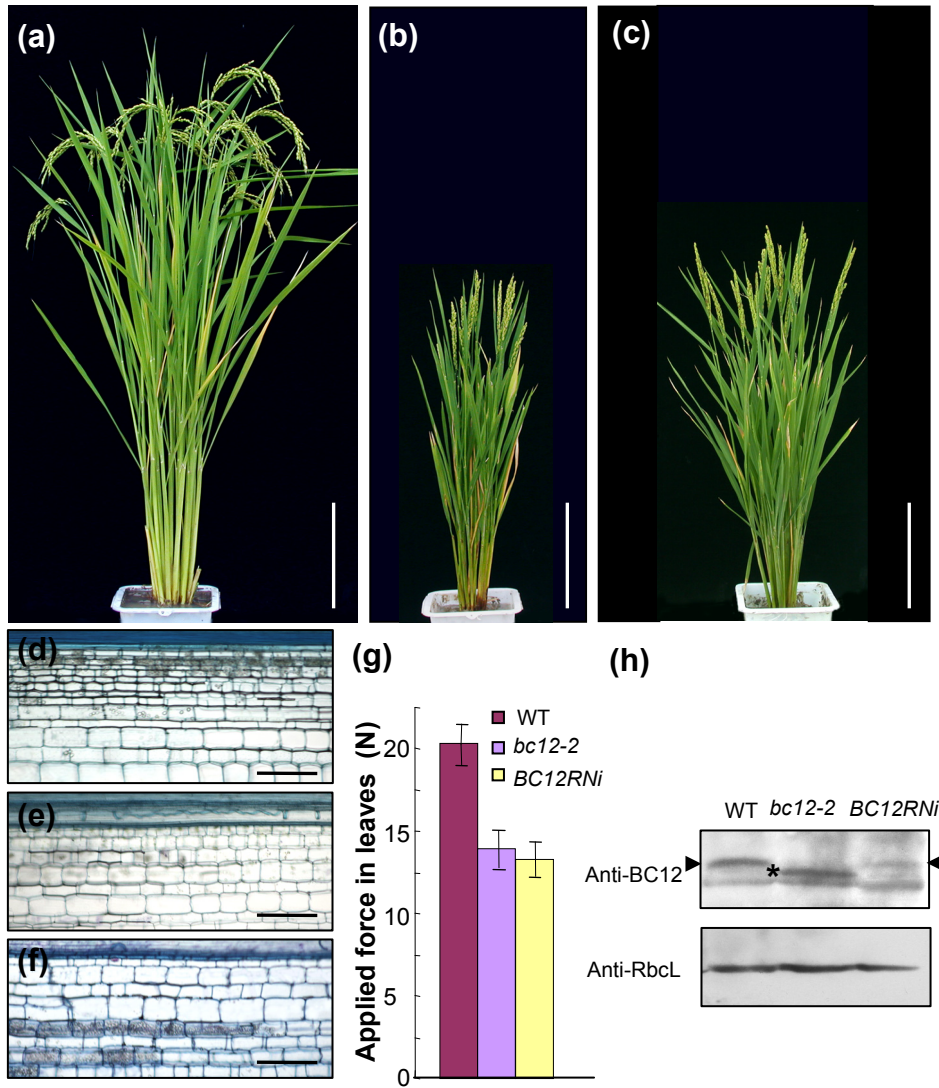

Figure S3

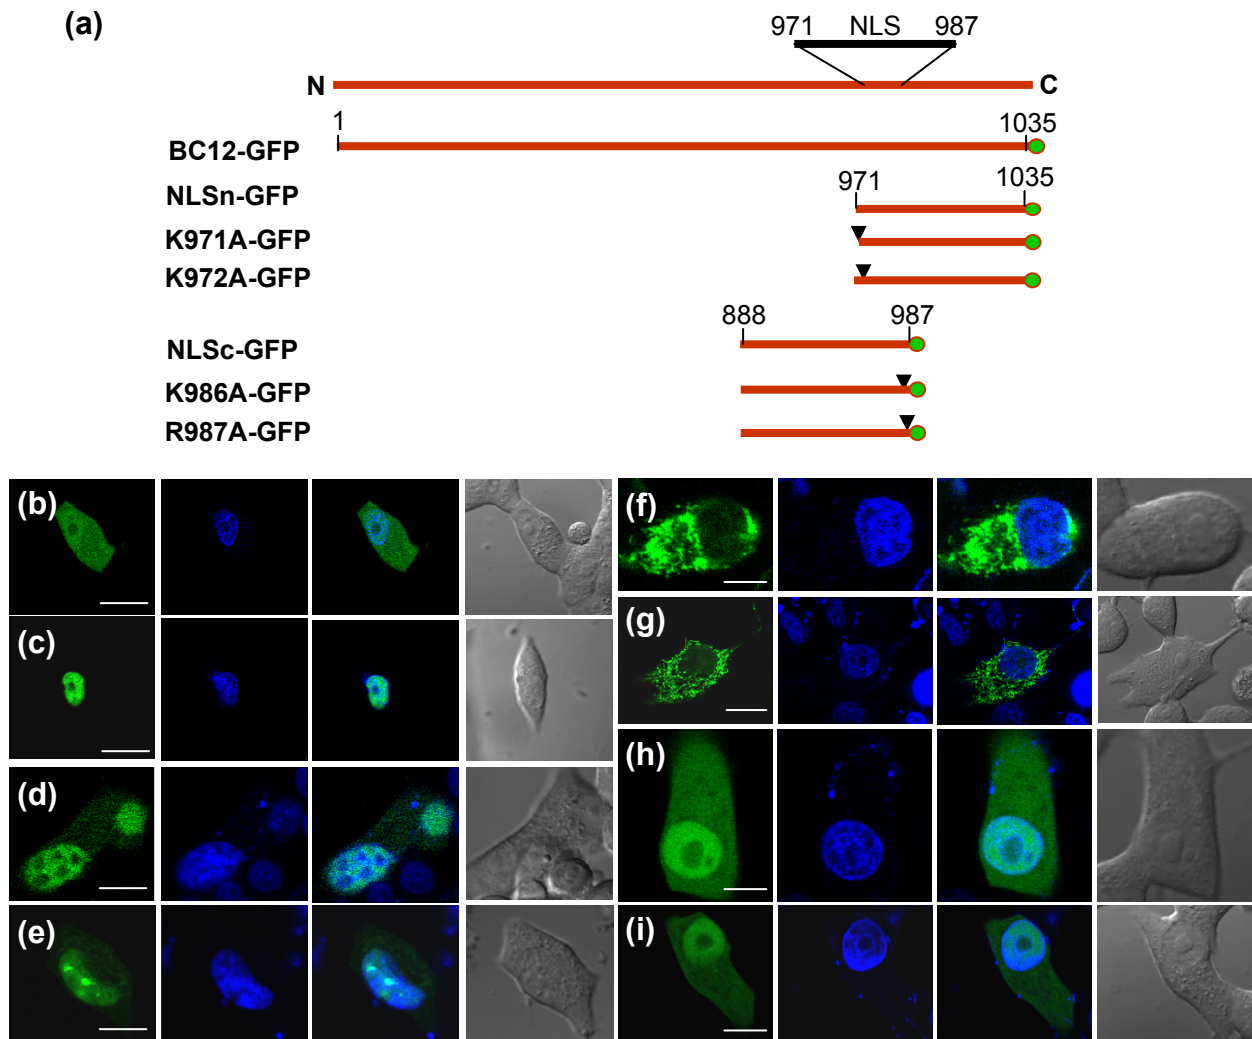

Figure S4

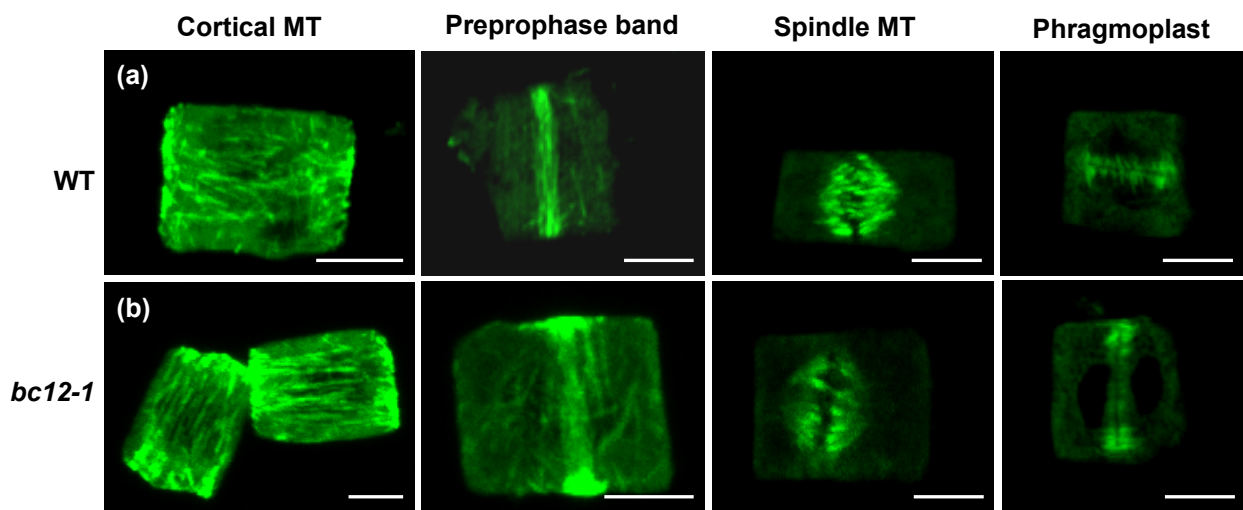

Figure S5

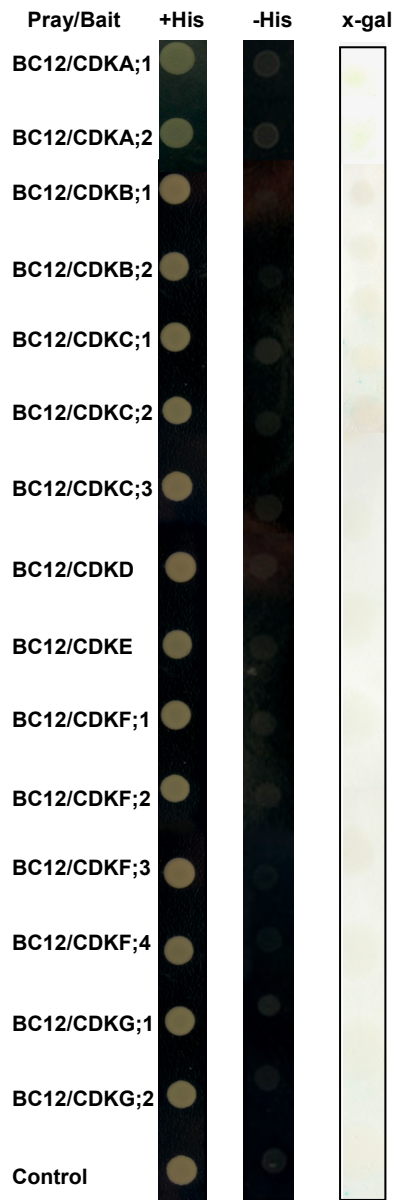

Supplement: tpj0063-0312-SD1.pdf [file tpj0063-0312-SD1.pdf]
